# Supplementary material for: Maqui berry exhibited therapeutic effects against DSS-induced ulcerative colitis in C57BL/6 mice
Source: Royal Society of Chemistry journal article supplement (doi:10.1039/c9fo00663j), 2019-01-01
Supplement: c9fo00663j1.pdf [file c9fo00663j1.pdf]

Supplementary illustrations

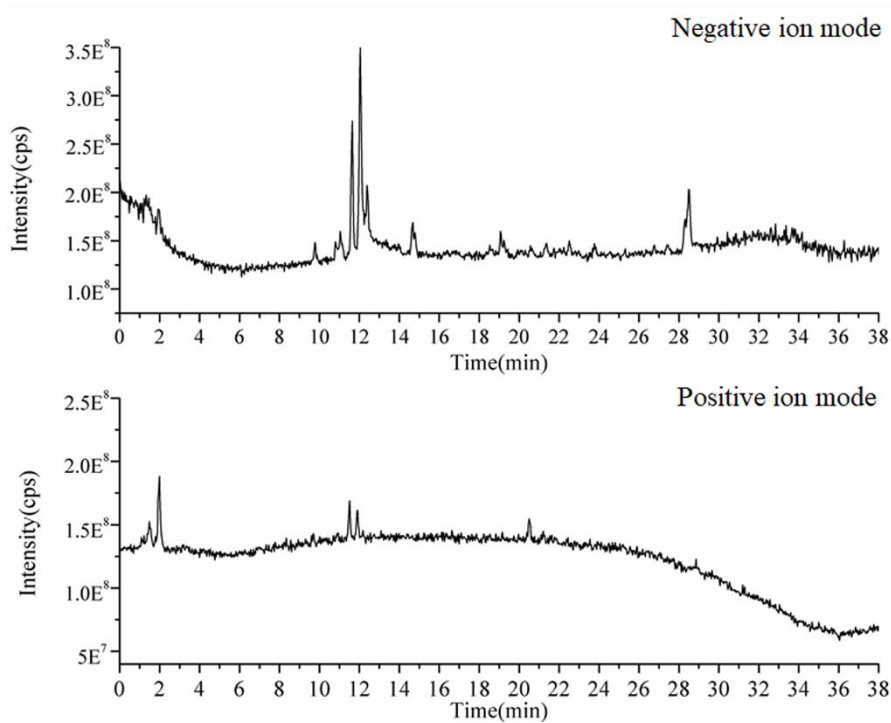

HPLC-ESI-MS total ion chromatogram of MWE analysed with negative and positive ion mode.
